# Supplementary material for: Membrane-Fluidization-Dependent and -Independent Pathways Are Involved in Heat-Stress-Inducible Gene Expression in the Marine Red Alga Neopyropia yezoensis
Source: MDPI journal article supplement (doi:10.3390/cells11091486), 2022-04-28
Supplement: s1 [file s1]

**Table S6.** Gene expression profiles of *NyHSP70-1* and *NyHSP70-2* in three generations of *Neopyropia yezoensis* under heat stress normalized using *eIF4A* as the reference gene

| Gene             | Generation | Temperature | Duration (h)        |                           |                           |                             |                           |                           |                           |                           |
|------------------|------------|-------------|---------------------|---------------------------|---------------------------|-----------------------------|---------------------------|---------------------------|---------------------------|---------------------------|
|                  |            |             | 0                   | 0.5                       | 1                         | 2                           | 4                         | 6                         | 8                         | 12                        |
| <i>NyHSP70-1</i> | G          | 5°C         | 1 ± 0 <sup>a</sup>  | 0.66 ± 0.08 <sup>a</sup>  | 0.59 ± 0.38 <sup>a</sup>  | 0.63 ± 0.44 <sup>a</sup>    | 0.72 ± 0.33 <sup>a</sup>  | 0.62 ± 0.19 <sup>a</sup>  | 0.75 ± 0.35 <sup>a</sup>  | 0.65 ± 0.52 <sup>a</sup>  |
|                  |            | 15°C        | 1 ± 0 <sup>a</sup>  | 0.61 ± 0.2 <sup>a</sup>   | 0.95 ± 0.57 <sup>a</sup>  | 0.55 ± 0.15 <sup>a</sup>    | 0.61 ± 0.16 <sup>a</sup>  | 0.68 ± 0.25 <sup>a</sup>  | 0.93 ± 0.41 <sup>a</sup>  | 0.86 ± 0.57 <sup>a</sup>  |
|                  |            | 25°C        | 1 ± 0 <sup>a</sup>  | 3.71 ± 1.55 <sup>bc</sup> | 4.22 ± 0.79 <sup>c</sup>  | 13.45 ± 1.99 <sup>c</sup>   | 6.35 ± 0.93 <sup>d</sup>  | 2.89 ± 1.38 <sup>b</sup>  | 2.59 ± 0.52 <sup>b</sup>  | 2.73 ± 0.61 <sup>b</sup>  |
|                  | S          | 5°C         | 1 ± 0 <sup>ab</sup> | 0.73 ± 0.11 <sup>ab</sup> | 0.82 ± 0.2 <sup>ab</sup>  | 0.66 ± 0.29 <sup>ab</sup>   | 0.49 ± 0.17 <sup>a</sup>  | 0.6 ± 0.32 <sup>ab</sup>  | 0.34 ± 0.12 <sup>a</sup>  | 0.5 ± 0.25 <sup>a</sup>   |
|                  |            | 15°C        | 1 ± 0 <sup>ab</sup> | 0.69 ± 0.28 <sup>ab</sup> | 0.64 ± 0.28 <sup>ab</sup> | 0.73 ± 0.15 <sup>ab</sup>   | 0.7 ± 0.24 <sup>ab</sup>  | 0.64 ± 0.2 <sup>ab</sup>  | 0.65 ± 0.21 <sup>ab</sup> | 1.06 ± 0.34 <sup>ab</sup> |
|                  |            | 25°C        | 1 ± 0 <sup>ab</sup> | 2.08 ± 0.28 <sup>bc</sup> | 4.71 ± 0.33 <sup>d</sup>  | 6.27 ± 1.26 <sup>c</sup>    | 2.39 ± 0.31 <sup>c</sup>  | 2.3 ± 0.31 <sup>c</sup>   | 1.52 ± 0.4 <sup>b</sup>   | 1.03 ± 0.34 <sup>ab</sup> |
|                  | CS         | 5°C         | 1 ± 0 <sup>b</sup>  | 0.85 ± 0.12 <sup>ab</sup> | 1.12 ± 0.13 <sup>b</sup>  | 0.67 ± 0.11 <sup>ab</sup>   | 0.7 ± 0.35 <sup>ab</sup>  | 0.48 ± 0.18 <sup>a</sup>  | 0.55 ± 0.36 <sup>ab</sup> | 0.35 ± 0.27 <sup>a</sup>  |
|                  |            | 15°C        | 1 ± 0 <sup>b</sup>  | 1.07 ± 0.16 <sup>b</sup>  | 0.95 ± 0.11 <sup>b</sup>  | 1.14 ± 0.2 <sup>b</sup>     | 1.15 ± 0.1 <sup>b</sup>   | 1.16 ± 0.07 <sup>b</sup>  | 1.15 ± 0.15 <sup>b</sup>  | 1.12 ± 0.1 <sup>b</sup>   |
|                  |            | 25°C        | 1 ± 0 <sup>b</sup>  | 3.67 ± 0.35 <sup>d</sup>  | 6.8 ± 0.56 <sup>c</sup>   | 3.62 ± 0.44 <sup>d</sup>    | 3.34 ± 0.2 <sup>d</sup>   | 3.29 ± 0.16 <sup>d</sup>  | 1.99 ± 0.08 <sup>c</sup>  | 1.79 ± 0.24 <sup>bc</sup> |
| <i>NyHSP70-2</i> | G          | 5°C         | 1 ± 0 <sup>a</sup>  | 0.45 ± 0.08 <sup>a</sup>  | 0.44 ± 0.09 <sup>a</sup>  | 0.45 ± 0.23 <sup>a</sup>    | 0.16 ± 0.07 <sup>a</sup>  | 0.35 ± 0.44 <sup>a</sup>  | 0.4 ± 0.49 <sup>a</sup>   | 0.34 ± 0.24 <sup>a</sup>  |
|                  |            | 15°C        | 1 ± 0 <sup>a</sup>  | 1.73 ± 1.36 <sup>a</sup>  | 1.36 ± 0.68 <sup>a</sup>  | 1.3 ± 0.91 <sup>a</sup>     | 1.37 ± 0.89 <sup>a</sup>  | 1.33 ± 0.87 <sup>a</sup>  | 1.34 ± 0.93 <sup>a</sup>  | 1 ± 0.34 <sup>a</sup>     |
|                  |            | 25°C        | 1 ± 0 <sup>a</sup>  | 13.9 ± 1.85 <sup>c</sup>  | 50.2 ± 4.32 <sup>ef</sup> | 126.33 ± 12.02 <sup>g</sup> | 44.73 ± 4.05 <sup>c</sup> | 21.79 ± 2.9 <sup>d</sup>  | 53.24 ± 4.7 <sup>f</sup>  | 5.52 ± 2.43 <sup>b</sup>  |
|                  | S          | 5°C         | 1 ± 0 <sup>ab</sup> | 0.92 ± 0.14 <sup>ab</sup> | 1.14 ± 0.24 <sup>b</sup>  | 0.82 ± 0.31 <sup>ab</sup>   | 0.7 ± 0.32 <sup>a</sup>   | 0.54 ± 0.38 <sup>a</sup>  | 0.59 ± 0.36 <sup>a</sup>  | 0.67 ± 0.35 <sup>a</sup>  |
|                  |            | 15°C        | 1 ± 0 <sup>ab</sup> | 1.23 ± 0.18 <sup>b</sup>  | 1.27 ± 0.19 <sup>b</sup>  | 1.16 ± 0.12 <sup>b</sup>    | 1.34 ± 0.32 <sup>b</sup>  | 1.28 ± 0.34 <sup>b</sup>  | 1.02 ± 0.06 <sup>ab</sup> | 0.63 ± 0.25 <sup>a</sup>  |
|                  |            | 25°C        | 1 ± 0 <sup>ab</sup> | 7.27 ± 0.67 <sup>c</sup>  | 21.91 ± 1.67 <sup>c</sup> | 28.51 ± 2.04 <sup>f</sup>   | 10.12 ± 0.79 <sup>d</sup> | 11.52 ± 0.88 <sup>d</sup> | 18.39 ± 1.83 <sup>c</sup> | 1.88 ± 0.5 <sup>b</sup>   |
|                  | CS         | 5°C         | 1 ± 0 <sup>b</sup>  | 0.84 ± 0.12 <sup>b</sup>  | 0.6 ± 0.14 <sup>ab</sup>  | 0.51 ± 0.46 <sup>ab</sup>   | 0.14 ± 0.09 <sup>a</sup>  | 0.44 ± 0.38 <sup>ab</sup> | 0.17 ± 0.08 <sup>a</sup>  | 0.32 ± 0.23 <sup>a</sup>  |
|                  |            | 15°C        | 1 ± 0 <sup>b</sup>  | 0.36 ± 0.09 <sup>a</sup>  | 0.4 ± 0.16 <sup>a</sup>   | 0.27 ± 0.13 <sup>a</sup>    | 0.42 ± 0.18 <sup>ab</sup> | 0.39 ± 0.15 <sup>a</sup>  | 0.34 ± 0.26 <sup>a</sup>  | 0.58 ± 0.16 <sup>ab</sup> |
|                  |            | 25°C        | 1 ± 0 <sup>b</sup>  | 3.96 ± 0.35 <sup>c</sup>  | 14.58 ± 1.15 <sup>c</sup> | 7.66 ± 0.51 <sup>d</sup>    | 3.6 ± 0.41 <sup>c</sup>   | 1.8 ± 0.28 <sup>b</sup>   | 8.8 ± 0.74 <sup>d</sup>   | 1.49 ± 0.43 <sup>b</sup>  |

Mean values ± SD were calculated from triplicate experiments, and letters denote statistically significant differences ( $p < 0.05$ ) determined by two-way ANOVA. G, gametophyte; S, sporophyte; CS, conchosporophyte.
