# Supplementary material for: Membrane-Fluidization-Dependent and -Independent Pathways Are Involved in Heat-Stress-Inducible Gene Expression in the Marine Red Alga Neopyropia yezoensis
Source: MDPI journal article supplement (doi:10.3390/cells11091486), 2022-04-28
Supplement: s1 [file s1]

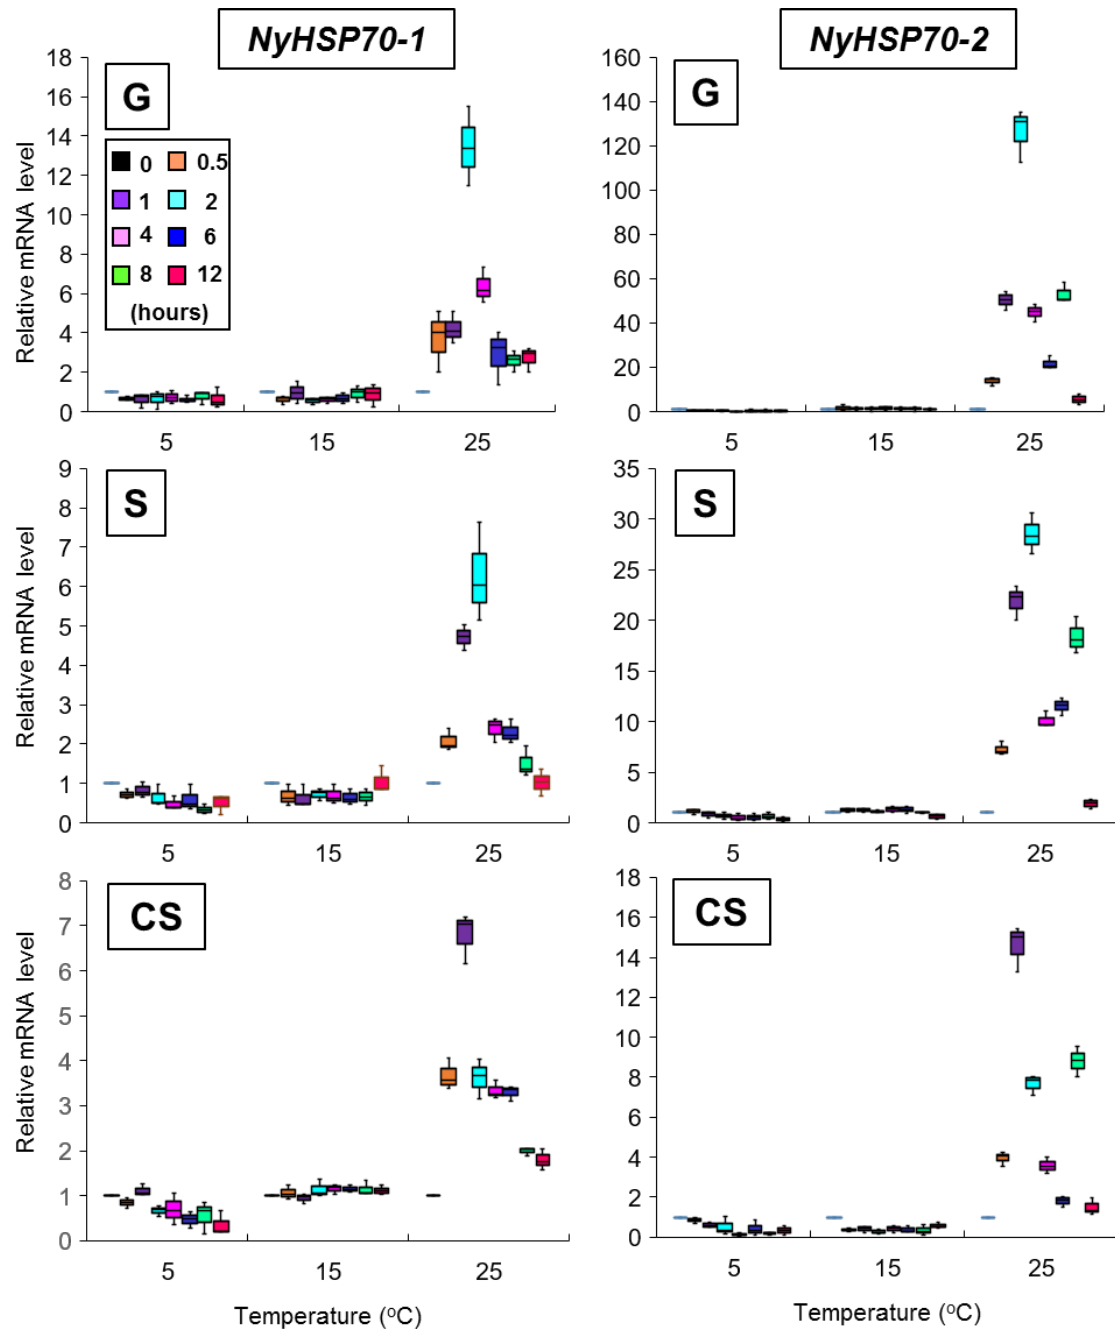

Figure S6. Temperature-dependent expression patterns of *NyHSP70-1* and *NyHSP70-2* with temporal comparisons in three life cycle generations of *Neopyropia yezoensis*. Relative mRNA levels were normalized using *eIF4A* as the reference gene. Significant differences in expression level among the three life cycle generations from triplicate independent replicates as defined by Tukey's test ( $p < 0.05$ ) in two-way ANOVA are shown in Table S6. G, gametophyte; S, sporophyte; CS, conchosporophyte.
