# Supplementary material for: Membrane-Fluidization-Dependent and -Independent Pathways Are Involved in Heat-Stress-Inducible Gene Expression in the Marine Red Alga Neopyropia yezoensis
Source: MDPI journal article supplement (doi:10.3390/cells11091486), 2022-04-28
Supplement: s1 [file s1]

**Table S5.** Gene expression profiles of *NyHTR2* and *NyHTR2L* in three generations of *Neopyropia yezoensis* under heat stress normalized using *eIF4A* as the reference gene

| Gene           | Generation | Temperature | Duration (h)        |                           |                           |                            |                           |                           |                           |                           |
|----------------|------------|-------------|---------------------|---------------------------|---------------------------|----------------------------|---------------------------|---------------------------|---------------------------|---------------------------|
|                |            |             | 0                   | 0.5                       | 1                         | 2                          | 4                         | 6                         | 8                         | 12                        |
| <i>NyHTR2</i>  | G          | 5°C         | 1 ± 0 <sup>b</sup>  | 0.03 ± 0.01 <sup>a</sup>  | 0.07 ± 0.02 <sup>a</sup>  | 0.28 ± 0.05 <sup>a</sup>   | 0.6 ± 0.2 <sup>ab</sup>   | 0.67 ± 0.06 <sup>ab</sup> | 0.86 ± 0.09 <sup>ab</sup> | 2.67 ± 0.45 <sup>d</sup>  |
|                |            | 15°C        | 1 ± 0 <sup>b</sup>  | 1.47 ± 0.21 <sup>bc</sup> | 0.94 ± 0.25 <sup>b</sup>  | 0.81 ± 0.28 <sup>b</sup>   | 1.21 ± 0.16 <sup>bc</sup> | 1.06 ± 0.38 <sup>bc</sup> | 1.3 ± 0.28 <sup>bc</sup>  | 1.43 ± 0.3 <sup>c</sup>   |
|                |            | 25°C        | 1 ± 0 <sup>b</sup>  | 2.27 ± 0.62 <sup>d</sup>  | 3.63 ± 0.94 <sup>dc</sup> | 12.46 ± 1.97 <sup>g</sup>  | 3.71 ± 1.19 <sup>dc</sup> | 4.24 ± 1.02 <sup>c</sup>  | 12.19 ± 2.55 <sup>g</sup> | 6.96 ± 1.44 <sup>f</sup>  |
| <i>NyHTR2L</i> | G          | 5°C         | 1 ± 0 <sup>ab</sup> | 0.07 ± 0.02 <sup>a</sup>  | 0.51 ± 0.04 <sup>a</sup>  | 2.99 ± 0.15 <sup>ab</sup>  | 2.77 ± 0.43 <sup>ab</sup> | 0.9 ± 0.17 <sup>ab</sup>  | 0.01 ± 0 <sup>a</sup>     | 5.11 ± 0.49 <sup>b</sup>  |
|                |            | 15°C        | 1 ± 0 <sup>ab</sup> | 2.33 ± 0.95 <sup>ab</sup> | 2.35 ± 1 <sup>ab</sup>    | 4.93 ± 0.35 <sup>b</sup>   | 5.43 ± 0.4 <sup>b</sup>   | 3.22 ± 0.84 <sup>b</sup>  | 1.48 ± 0.08 <sup>ab</sup> | 4.14 ± 0.94 <sup>b</sup>  |
|                |            | 25°C        | 1 ± 0 <sup>ab</sup> | 8.05 ± 1.21 <sup>c</sup>  | 35.21 ± 1.52 <sup>c</sup> | 64.43 ± 4.05 <sup>fg</sup> | 16.87 ± 1.29 <sup>d</sup> | 27.82 ± 5.89 <sup>c</sup> | 73.19 ± 6.37 <sup>g</sup> | 54.74 ± 4.37 <sup>f</sup> |
|                | S          | 5°C         | 1 ± 0 <sup>b</sup>  | 1 ± 0.1 <sup>b</sup>      | 0.97 ± 0.1 <sup>b</sup>   | 0.88 ± 0.08 <sup>b</sup>   | 1.37 ± 0.02 <sup>b</sup>  | 0.51 ± 0.09 <sup>a</sup>  | 0.42 ± 0.11 <sup>a</sup>  | 0.98 ± 0.05 <sup>b</sup>  |
|                |            | 15°C        | 1 ± 0 <sup>b</sup>  | 1.43 ± 0.08 <sup>bc</sup> | 1.36 ± 0.32 <sup>bc</sup> | 1.59 ± 0.44 <sup>bc</sup>  | 1.42 ± 0.15 <sup>bc</sup> | 1.75 ± 0.11 <sup>bc</sup> | 1.92 ± 0.2b <sup>c</sup>  | 2.05 ± 0.3 <sup>c</sup>   |
|                |            | 25°C        | 1 ± 0 <sup>b</sup>  | 1.53 ± 0.16 <sup>bc</sup> | 4.11 ± 0.57 <sup>d</sup>  | 7.04 ± 0.82 <sup>c</sup>   | 1.54 ± 0.28 <sup>bc</sup> | 4.2 ± 0.53 <sup>d</sup>   | 11.54 ± 0.97 <sup>f</sup> | 7.74 ± 0.23 <sup>e</sup>  |
|                | CS         | 5°C         | 1 ± 0 <sup>b</sup>  | 0.73 ± 0.08 <sup>ab</sup> | 1.29 ± 0.16 <sup>bc</sup> | 0.5 ± 0.02 <sup>ab</sup>   | 0.35 ± 0.03 <sup>a</sup>  | 0.59 ± 0.06 <sup>ab</sup> | 0.91 ± 0.1 <sup>b</sup>   | 0.93 ± 0.08 <sup>b</sup>  |
|                |            | 15°C        | 1 ± 0 <sup>b</sup>  | 0.48 ± 0.08 <sup>a</sup>  | 0.35 ± 0.04 <sup>a</sup>  | 0.48 ± 0.05 <sup>a</sup>   | 0.71 ± 0.01 <sup>ab</sup> | 0.64 ± 0.06 <sup>ab</sup> | 0.62 ± 0.02 <sup>ab</sup> | 1.04 ± 0.03 <sup>bc</sup> |
|                |            | 25°C        | 1 ± 0 <sup>b</sup>  | 0.64 ± 0.05 <sup>ab</sup> | 1.41 ± 0.03 <sup>c</sup>  | 2.6 ± 0.46 <sup>d</sup>    | 1.66 ± 0.05 <sup>cd</sup> | 1.29 ± 0.13 <sup>bc</sup> | 4.93 ± 0.19 <sup>c</sup>  | 3.14 ± 0.24 <sup>d</sup>  |

Mean values ± SD were calculated from triplicate experiments, and letters denote statistically significant differences ( $p < 0.05$ ) determined by two-way ANOVA. G, gametophyte; S, sporophyte; CS, conchosporophyte.
