# Supplementary material for: Membrane-Fluidization-Dependent and -Independent Pathways Are Involved in Heat-Stress-Inducible Gene Expression in the Marine Red Alga Neopyropia yezoensis
Source: MDPI journal article supplement (doi:10.3390/cells11091486), 2022-04-28
Supplement: s1 [file s1]

**Table S3.** Sequences of primers for heat stress-inducible genes used for qRT-PCR

| Primer name          | Primer sequence<br>(5' to 3') | Annealing<br>temperature (°C) | Product size<br>(bp) |
|----------------------|-------------------------------|-------------------------------|----------------------|
| <i>Q-NyMBF1-F</i>    | TCGAGCTTGGAGAGATTGGT          | 58                            | 114                  |
| <i>Q-NyMBF1-R</i>    | GAAGAAGGCGGATGTCTCTG          |                               |                      |
| <i>Q-NyHTR2-F</i>    | CACACCTACGCGTGCTACTT          | 59                            | 134                  |
| <i>Q-NyHTR2-R</i>    | CACTTGTCGCACTTGCACTT          |                               |                      |
| <i>Q-NyHTR2L-F</i>   | CATACCTACCCGTGCTGGTT          | 60                            | 134                  |
| <i>Q-NyHTR2L-R</i>   | CACACGTCACACTTGCACTG          |                               |                      |
| <i>Q-NyHSP70-1-F</i> | GGTTCGCACCCCAACATCAC          | 59                            | 112                  |
| <i>Q-NyHSP70-1-R</i> | TCACAGCCACAACCTCTCACC         |                               |                      |
| <i>Q-NyHSP70-2-F</i> | CATTGGTGACTCAGCGAAGA          | 59                            | 143                  |
| <i>Q-NyHSP70-2-R</i> | CCTTCTGCACCACCTTGAAT          |                               |                      |
