# Supplementary material for: Membrane-Fluidization-Dependent and -Independent Pathways Are Involved in Heat-Stress-Inducible Gene Expression in the Marine Red Alga Neopyropia yezoensis
Source: MDPI journal article supplement (doi:10.3390/cells11091486), 2022-04-28
Supplement: s1 [file s1]

**Table S2.** Expression stability analysis of four reference genes by NormFinder in three life cycle generations of *Neopyropia yezoensis*

| Gametophyte |                               |                 | Sporophyte |                               |                 | Conchosporophyte |                               |                 |
|-------------|-------------------------------|-----------------|------------|-------------------------------|-----------------|------------------|-------------------------------|-----------------|
| Rank        | Gene                          | Stability value | Rank       | Gene                          | Stability value | Rank             | Gene                          | Stability value |
| 1           | <i>eIF4A</i>                  | 0.137           | 1          | <i>eIF4A</i>                  | 0.278           | 1                | <i>eIF4A</i>                  | 0.134           |
| 2           | <i>EF1<math>\alpha</math></i> | 0.208           | 2          | <i>GAPDH</i>                  | 0.348           | 2                | <i>GAPDH</i>                  | 0.300           |
| 3           | <i>GAPDH</i>                  | 0.544           | 3          | <i>EF1<math>\alpha</math></i> | 0.403           | 3                | <i>EF1<math>\alpha</math></i> | 0.326           |
