# Supplementary material for: Membrane-Fluidization-Dependent and -Independent Pathways Are Involved in Heat-Stress-Inducible Gene Expression in the Marine Red Alga Neopyropia yezoensis
Source: MDPI journal article supplement (doi:10.3390/cells11091486), 2022-04-28
Supplement: s1 [file s1]

**Table S1.** Sequences of primers for candidates of reference genes used for qRT-PCR

| Gene                          | Primer sequence<br>(5' to 3') | Amplicon<br>length (bp) | Efficiency<br>(%) | Correlation<br>coefficient ( $R^2$ ) |
|-------------------------------|-------------------------------|-------------------------|-------------------|--------------------------------------|
| <i>GAPDH</i>                  | CCAACAAGTGGGAGTAAGCG          | 104                     | 99.1              | 0.997                                |
|                               | GGACAGAACCGAACAGCGTA          |                         |                   |                                      |
| <i>EF1<math>\alpha</math></i> | TTTTGGTGGCACTGCTGAT           | 141                     | 98                | 0.9975                               |
|                               | TACACGCACAAGTTGGGGA           |                         |                   |                                      |
| <i>eIF4A</i>                  | GCTTTCTGTCTGGACGAGG           | 181                     | 101               | 0.9992                               |
|                               | TCTTCACAAGGATGCGGAT           |                         |                   |                                      |
