# Supplementary material for: Membrane-Fluidization-Dependent and -Independent Pathways Are Involved in Heat-Stress-Inducible Gene Expression in the Marine Red Alga Neopyropia yezoensis
Source: MDPI journal article supplement (doi:10.3390/cells11091486), 2022-04-28
Supplement: s1 [file s1]

**Table S4.** Temperature-dependent gene expression profiles of *NyMBF1* in three life cycle generations of *Neopyropia yezoensis* normalized using reference genes

| Generation | Reference gene | Temperature | Duration (h)        |                            |                            |                            |                            |                            |                             |                            |
|------------|----------------|-------------|---------------------|----------------------------|----------------------------|----------------------------|----------------------------|----------------------------|-----------------------------|----------------------------|
|            |                |             | 0                   | 0.5                        | 1                          | 2                          | 4                          | 6                          | 8                           | 12                         |
| G          | <i>GAPDH</i>   | 5°C         | 1 ± 0 <sup>a</sup>  | 1.32 ± 0.07 <sup>a</sup>   | 1.85 ± 0.09 <sup>a</sup>   | 2.09 ± 0.04 <sup>a</sup>   | 1.49 ± 0.04 <sup>a</sup>   | 3.71 ± 0.13 <sup>a</sup>   | 6.3 ± 0.97 <sup>ab</sup>    | 20.2 ± 2.55 <sup>c</sup>   |
|            |                | 15°C        | 1 ± 0 <sup>a</sup>  | 0.76 ± 0.08 <sup>a</sup>   | 1.11 ± 0.13 <sup>a</sup>   | 1.71 ± 0.16 <sup>a</sup>   | 10.92 ± 1.37 <sup>b</sup>  | 24.75 ± 1.75 <sup>cd</sup> | 136.98 ± 2.85 <sup>f</sup>  | 21.38 ± 1.88 <sup>cd</sup> |
|            |                | 25°C        | 1 ± 0 <sup>a</sup>  | 1.11 ± 0.12 <sup>a</sup>   | 2.56 ± 0.1 <sup>a</sup>    | 4.87 ± 0.11 <sup>ab</sup>  | 26.35 ± 2.06 <sup>d</sup>  | 41.86 ± 3.01 <sup>e</sup>  | 143.54 ± 6.27 <sup>g</sup>  | 20.05 ± 2.07 <sup>c</sup>  |
|            | <i>EF1α</i>    | 5°C         | 1 ± 0 <sup>a</sup>  | 2.75 ± 0.08 <sup>g</sup>   | 3.95 ± 0.18 <sup>j</sup>   | 2.33 ± 0.17 <sup>ef</sup>  | 1.28 ± 0.22 <sup>ab</sup>  | 2.03 ± 0.19 <sup>cde</sup> | 1.18 ± 0.17 <sup>a</sup>    | 1.12 ± 0.13 <sup>a</sup>   |
|            |                | 15°C        | 1 ± 0 <sup>a</sup>  | 1.32 ± 0.09 <sup>ab</sup>  | 2.26 ± 0.17 <sup>def</sup> | 1.67 ± 0.2 <sup>bc</sup>   | 1.65 ± 0.2 <sup>bc</sup>   | 1.77 ± 0.19 <sup>c</sup>   | 1.87 ± 0.18 <sup>cd</sup>   | 1.06 ± 0.16 <sup>a</sup>   |
|            |                | 25°C        | 1 ± 0 <sup>a</sup>  | 1.74 ± 0.15 <sup>c</sup>   | 2.5 ± 0.14 <sup>fg</sup>   | 3.54 ± 0.12 <sup>ij</sup>  | 6.27 ± 0.22 <sup>l</sup>   | 3.22 ± 0.23 <sup>i</sup>   | 4.7 ± 0.41 <sup>k</sup>     | 1.07 ± 0.06 <sup>a</sup>   |
|            | <i>eIF4A</i>   | 5°C         | 1 ± 0 <sup>a</sup>  | 1.9 ± 0.59 <sup>a</sup>    | 1.57 ± 0.12 <sup>ab</sup>  | 1.64 ± 0.12 <sup>ab</sup>  | 1.85 ± 0.18 <sup>ab</sup>  | 1.4 ± 0.25 <sup>a</sup>    | 1.65 ± 0.26 <sup>a</sup>    | 3.44 ± 0.1 <sup>ab</sup>   |
|            |                | 15°C        | 1 ± 0 <sup>a</sup>  | 2.2 ± 0.18 <sup>ab</sup>   | 1.92 ± 0.14 <sup>b</sup>   | 2.89 ± 0.15 <sup>ab</sup>  | 3.15 ± 0.1 <sup>ab</sup>   | 3.2 ± 0.15 <sup>ab</sup>   | 3.71 ± 0.27 <sup>ab</sup>   | 3.26 ± 0.22 <sup>ab</sup>  |
|            |                | 25°C        | 1 ± 0 <sup>a</sup>  | 2.61 ± 0.37 <sup>ab</sup>  | 6.15 ± 0.14 <sup>bc</sup>  | 43.27 ± 3.58 <sup>f</sup>  | 19.07 ± 1.6 <sup>e</sup>   | 10.94 ± 1.7 <sup>d</sup>   | 55.72 ± 5.15 <sup>g</sup>   | 10.4 ± 1 <sup>cd</sup>     |
| S          | <i>GAPDH</i>   | 5°C         | 1 ± 0 <sup>a</sup>  | 1.05 ± 0.27 <sup>a</sup>   | 1.07 ± 0.15 <sup>a</sup>   | 1.15 ± 0.13 <sup>a</sup>   | 1.51 ± 0.16 <sup>a</sup>   | 2.55 ± 0.25 <sup>ab</sup>  | 5.23 ± 0.79 <sup>cd</sup>   | 9.44 ± 1.18 <sup>ef</sup>  |
|            |                | 15°C        | 1 ± 0 <sup>a</sup>  | 0.97 ± 0.09 <sup>a</sup>   | 1.23 ± 0.15 <sup>a</sup>   | 1.47 ± 0.23 <sup>ab</sup>  | 3.25 ± 0.34 <sup>abc</sup> | 7.57 ± 0.34 <sup>de</sup>  | 7.18 ± 0.86 <sup>de</sup>   | 2.43 ± 0.15 <sup>ab</sup>  |
|            |                | 25°C        | 1 ± 0 <sup>a</sup>  | 2.15 ± 0.2 <sup>ab</sup>   | 4.48 ± 0.42 <sup>bc</sup>  | 8.03 ± 0.31 <sup>e</sup>   | 10.88 ± 0.66 <sup>f</sup>  | 18.68 ± 2.05 <sup>g</sup>  | 17.74 ± 1.84 <sup>g</sup>   | 7.71 ± 1.09 <sup>e</sup>   |
|            | <i>EF1α</i>    | 5°C         | 1 ± 0 <sup>a</sup>  | 1.54 ± 0.22 <sup>a</sup>   | 2.99 ± 0.28 <sup>ab</sup>  | 3.31 ± 0.27 <sup>ab</sup>  | 3.12 ± 0.23 <sup>ab</sup>  | 1.34 ± 0.2 <sup>a</sup>    | 1.41 ± 0.15 <sup>a</sup>    | 1.05 ± 0.18 <sup>a</sup>   |
|            |                | 15°C        | 1 ± 0 <sup>a</sup>  | 1.01 ± 0.23 <sup>a</sup>   | 7.48 ± 0.51 <sup>de</sup>  | 5.66 ± 0.49 <sup>bcd</sup> | 3.59 ± 0.49 <sup>abc</sup> | 2.39 ± 0.22 <sup>a</sup>   | 1.32 ± 0.07 <sup>a</sup>    | 1.15 ± 0.17 <sup>a</sup>   |
|            |                | 25°C        | 1 ± 0 <sup>a</sup>  | 2.89 ± 0.36 <sup>ab</sup>  | 32.13 ± 4.36 <sup>g</sup>  | 12.52 ± 0.47 <sup>f</sup>  | 10.19 ± 1.09 <sup>ef</sup> | 6.6 ± 0.43 <sup>cd</sup>   | 2.45 ± 0.37 <sup>ab</sup>   | 1.43 ± 0.22 <sup>a</sup>   |
|            | <i>eIF4A</i>   | 5°C         | 1 ± 0 <sup>a</sup>  | 0.84 ± 0.08 <sup>a</sup>   | 0.96 ± 0.08 <sup>a</sup>   | 0.93 ± 0.09 <sup>a</sup>   | 1 ± 0.04 <sup>a</sup>      | 0.8 ± 0.15 <sup>a</sup>    | 0.98 ± 0.24 <sup>a</sup>    | 2.41 ± 0.2 <sup>a</sup>    |
|            |                | 15°C        | 1 ± 0 <sup>a</sup>  | 1.08 ± 0.03 <sup>a</sup>   | 1.61 ± 0.37 <sup>a</sup>   | 1.92 ± 0.32 <sup>a</sup>   | 2.15 ± 0.2 <sup>a</sup>    | 2.62 ± 0.15 <sup>a</sup>   | 2.23 ± 0.18 <sup>a</sup>    | 2.34 ± 0.17 <sup>a</sup>   |
|            |                | 25°C        | 1 ± 0 <sup>a</sup>  | 3.24 ± 0.35 <sup>a</sup>   | 10.28 ± 1.21 <sup>bc</sup> | 33.57 ± 2.84 <sup>e</sup>  | 13.28 ± 1.99 <sup>cd</sup> | 13.86 ± 1.51 <sup>d</sup>  | 32.86 ± 2.29 <sup>e</sup>   | 8.21 ± 0.26 <sup>b</sup>   |
| CS         | <i>GAPDH</i>   | 5°C         | 1 ± 0 <sup>ab</sup> | 0.86 ± 0.07 <sup>a</sup>   | 1.76 ± 0.2 <sup>ab</sup>   | 1.74 ± 0.07 <sup>ab</sup>  | 3.54 ± 0.11 <sup>abc</sup> | 3.52 ± 0.45 <sup>abc</sup> | 11.61 ± 0.58 <sup>d</sup>   | 4.93 ± 0.32 <sup>bc</sup>  |
|            |                | 15°C        | 1 ± 0 <sup>ab</sup> | 1.52 ± 0.15 <sup>ab</sup>  | 1.38 ± 0.28 <sup>ab</sup>  | 1.79 ± 0.1 <sup>ab</sup>   | 2.79 ± 0.16 <sup>abc</sup> | 3.03 ± 0.08 <sup>abc</sup> | 6.48 ± 0.13 <sup>c</sup>    | 4.13 ± 0.12 <sup>abc</sup> |
|            |                | 25°C        | 1 ± 0 <sup>ab</sup> | 1.85 ± 0.15 <sup>ab</sup>  | 2.4 ± 0.27 <sup>ab</sup>   | 3.14 ± 0.16 <sup>abc</sup> | 6.61 ± 0.65 <sup>c</sup>   | 12.51 ± 2.23 <sup>d</sup>  | 41.25 ± 2.69 <sup>e</sup>   | 69.79 ± 4.62 <sup>f</sup>  |
|            | <i>EF1α</i>    | 5°C         | 1 ± 0 <sup>a</sup>  | 4.69 ± 0.3 <sup>ef</sup>   | 7.71 ± 0.77 <sup>g</sup>   | 2.36 ± 0.31 <sup>bcd</sup> | 10.47 ± 1.53 <sup>h</sup>  | 5.07 ± 0.47 <sup>f</sup>   | 3.25 ± 0.23 <sup>cdef</sup> | 1.16 ± 0.14 <sup>ab</sup>  |
|            |                | 15°C        | 1 ± 0 <sup>a</sup>  | 1.53 ± 0.18 <sup>ab</sup>  | 1.67 ± 0.15 <sup>abc</sup> | 3.7 ± 0.41 <sup>def</sup>  | 4.18 ± 0.44 <sup>def</sup> | 3.97 ± 0.26 <sup>def</sup> | 4.24 ± 0.73 <sup>def</sup>  | 1.79 ± 0.3 <sup>abc</sup>  |
|            |                | 25°C        | 1 ± 0 <sup>a</sup>  | 2.45 ± 0.5 <sup>abcd</sup> | 13.21 ± 1.84 <sup>i</sup>  | 9.54 ± 0.87 <sup>gh</sup>  | 7.77 ± 0.73 <sup>g</sup>   | 4.62 ± 0.46 <sup>ef</sup>  | 3.77 ± 0.17 <sup>def</sup>  | 2.8 ± 0.19 <sup>bcd</sup>  |
|            | <i>eIF4A</i>   | 5°C         | 1 ± 0 <sup>a</sup>  | 1.06 ± 0.18 <sup>a</sup>   | 1.69 ± 0.15 <sup>ab</sup>  | 0.73 ± 0.03 <sup>a</sup>   | 0.84 ± 0.11 <sup>a</sup>   | 1.21 ± 0.19 <sup>a</sup>   | 1.48 ± 0.16 <sup>ab</sup>   | 1.22 ± 0.11 <sup>a</sup>   |
|            |                | 15°C        | 1 ± 0 <sup>a</sup>  | 0.86 ± 0.13 <sup>a</sup>   | 0.77 ± 0.09 <sup>a</sup>   | 0.87 ± 0.11 <sup>a</sup>   | 1.18 ± 0.13 <sup>a</sup>   | 1.34 ± 0.13 <sup>a</sup>   | 1.34 ± 0.11 <sup>a</sup>    | 1.48 ± 0.03 <sup>ab</sup>  |
|            |                | 25°C        | 1 ± 0 <sup>a</sup>  | 1.27 ± 0.05 <sup>a</sup>   | 2.55 ± 0.09 <sup>bc</sup>  | 7.63 ± 1.12 <sup>f</sup>   | 4.06 ± 0.29 <sup>de</sup>  | 4.2 ± 0.34 <sup>e</sup>    | 10.99 ± 0.85 <sup>g</sup>   | 3 ± 0.75 <sup>cd</sup>     |

Mean values ± SD were calculated from triplicate experiments, and letters denote statistically significant differences ( $p < 0.05$ ) determined by two-way ANOVA. G, gametophyte; S, sporophyte; CS, conchosporephyte.
