# Supplementary material for: Membrane-Fluidization-Dependent and -Independent Pathways Are Involved in Heat-Stress-Inducible Gene Expression in the Marine Red Alga Neopyropia yezoensis
Source: Cells. 2022 Apr 28;11(9):1486. doi: 10.3390/cells11091486 (PMC9100149; doi:10.3390/cells11091486)
Supplement: Supplementary file 1 [file cells-11-01486-s001.zip]

Archive with 13 entries (13 files):
- Supplementary files for submission/Figure S1.pdf
- Supplementary files for submission/Figure S2.pdf
- Supplementary files for submission/Figure S3.pdf
- Supplementary files for submission/Figure S4.pdf
- Supplementary files for submission/Figure S5.pdf
- Supplementary files for submission/Figure S6.pdf
- Supplementary files for submission/Figure S7.pdf
- Supplementary files for submission/Table S1.pdf
- Supplementary files for submission/Table S2.pdf
- Supplementary files for submission/Table S3.pdf
- Supplementary files for submission/Table S4.pdf
- Supplementary files for submission/Table S5.pdf
- Supplementary files for submission/Table S6.pdf
